# Supplementary material for: Identification of In-Chain-Functionalized Compounds and Methyl-Branched Alkanes in Cuticular Waxes of Triticum aestivum cv. Bethlehem
Source: PubMed Central journal article supplement (PMC5098774; doi:10.1371/journal.pone.0165827), 2016-11-07
Supplement: pone.0165827.s001.pdf [file pone.0165827.s001.pdf]

**S1 Table. Characteristic fragments and relative abundances of secondary alcohols detected in wheat leaf wax.** The fragments ( $m/z$ ) of trimethylsilyl ether derivatives used to identify different secondary alcohol homologs and isomers are listed. Relative abundances (percent of respective homologs) were calculated from the abundances of the smaller isomer-specific fragments in a single, representative GC-MS run of the TLC fraction  $R_f$  0.72 (fraction **A**).

| Compound              | Fragments characteristic of homolog ( $m/z$ ) |     | Fragments characteristic of isomer ( $m/z$ ) |     | Relative isomer abundance (% of homolog) |
|-----------------------|-----------------------------------------------|-----|----------------------------------------------|-----|------------------------------------------|
|                       |                                               |     |                                              |     |                                          |
| Pentacosan-8-ol       | 350                                           | 425 | 201                                          | 341 | 17                                       |
| Pentacosan-9-ol       |                                               |     | 215                                          | 327 | n.q.                                     |
| Pentacosan-10-ol      |                                               |     | 229                                          | 313 | 25                                       |
| Pentacosan-11-ol      |                                               |     | 243                                          | 299 | n.q.                                     |
| Pentacosan-12-ol      |                                               |     | 257                                          | 285 | 58                                       |
| Pentacosan-13-ol      |                                               |     | 271                                          |     | n.q.                                     |
| Heptacosan-9-ol       | 378                                           | 453 | 215                                          | 355 | 2                                        |
| Heptacosan-10-ol      |                                               |     | 229                                          | 341 | 8                                        |
| Heptacosan-11-ol      |                                               |     | 243                                          | 327 | 24                                       |
| Heptacosan-12-ol      |                                               |     | 257                                          | 313 | 32                                       |
| Heptacosan-13-ol      |                                               |     | 271                                          | 299 | 18                                       |
| Heptacosan-14-ol      |                                               |     | 285                                          |     | 15                                       |
| Nonacosan-9-ol        | 406                                           | 481 | 215                                          | 383 | 1                                        |
| Nonacosan-10-ol       |                                               |     | 229                                          | 369 | 8                                        |
| Nonacosan-11-ol       |                                               |     | 243                                          | 355 | 35                                       |
| Nonacosan-12-ol       |                                               |     | 257                                          | 341 | 28                                       |
| Nonacosan-13-ol       |                                               |     | 271                                          | 327 | 14                                       |
| Nonacosan-14-ol       |                                               |     | 285                                          | 313 | 7                                        |
| Nonacosan-15-ol       | 299                                           |     | 7                                            |     |                                          |
| Hentriacontan-8-ol    | 434                                           | 509 | 201                                          | 425 | 1                                        |
| Hentriacontan-9-ol    |                                               |     | 215                                          | 411 | 2                                        |
| Hentriacontan-10-ol   |                                               |     | 229                                          | 397 | 5                                        |
| Hentriacontan-11-ol   |                                               |     | 243                                          | 383 | 16                                       |
| Hentriacontan-12-ol   |                                               |     | 257                                          | 369 | 61                                       |
| Hentriacontan-13-ol   |                                               |     | 271                                          | 355 | 10                                       |
| Hentriacontan-14-ol   |                                               |     | 285                                          | 341 | 2                                        |
| Hentriacontan-15-ol   |                                               |     | 299                                          | 327 | 1                                        |
| Hentriacontan-16-ol   |                                               |     | 313                                          |     | 1                                        |
| Trtriacontan-9-ol     | 462                                           | 537 | 215                                          | 439 | 1                                        |
| Trtriacontan-10-ol    |                                               |     | 229                                          | 425 | 3                                        |
| Trtriacontan-11-ol    |                                               |     | 243                                          | 411 | 14                                       |
| Trtriacontan-12-ol    |                                               |     | 257                                          | 397 | 65                                       |
| Trtriacontan-13-ol    |                                               |     | 271                                          | 383 | 12                                       |
| Trtriacontan-14-ol    |                                               |     | 285                                          | 369 | 4                                        |
| Trtriacontan-15-ol    |                                               |     | 299                                          | 355 | 1                                        |
| Trtriacontan-16-ol    |                                               |     | 313                                          | 341 | tr                                       |
| Trtriacontan-17-ol    |                                               |     | 327                                          |     | 1                                        |
| Pentatriacontan-8-ol  | 490                                           | 565 | 201                                          | 481 | 1                                        |
| Pentatriacontan-9-ol  |                                               |     | 215                                          | 467 | 4                                        |
| Pentatriacontan-10-ol |                                               |     | 229                                          | 453 | 13                                       |
| Pentatriacontan-11-ol |                                               |     | 243                                          | 439 | 36                                       |
| Pentatriacontan-12-ol |                                               |     | 257                                          | 425 | 39                                       |
| Pentatriacontan-13-ol |                                               |     | 271                                          | 411 | 6                                        |
| Pentatriacontan-14-ol |                                               |     | 285                                          | 397 | tr                                       |
| Pentatriacontan-15-ol |                                               |     | 299                                          | 383 | tr                                       |
| Pentatriacontan-16-ol |                                               |     | 313                                          | 369 | tr                                       |
| Pentatriacontan-17-ol |                                               |     | 327                                          | 355 | 1                                        |
| Pentatriacontan-18-ol |                                               |     | 341                                          |     | 1                                        |
