# Supplementary material for: Identification of In-Chain-Functionalized Compounds and Methyl-Branched Alkanes in Cuticular Waxes of Triticum aestivum cv. Bethlehem
Source: PubMed Central journal article supplement (PMC5098774; doi:10.1371/journal.pone.0165827), 2016-11-07
Supplement: pone.0165827.s002.pdf [file pone.0165827.s002.pdf]

**S2 Table. Characteristic fragments and relative abundances of diols with one primary and one secondary hydroxyl function detected in wheat leaf wax.** The fragments ( $m/z$ ) of bis(trimethylsilyl) ether derivatives used to identify different diol homologs and isomers are listed. Relative abundances (percent of respective homologs) were averages across the abundances of the smaller isomer-specific fragments in a single, representative GC-MS run of the TLC fraction  $R_f$  0.30 (fraction **B**).

| Compound              | Fragments characteristic of homolog ( $m/z$ ) |     |     | Fragments characteristic of isomer ( $m/z$ ) |     |     | Relative isomer abundance (% of homolog) |
|-----------------------|-----------------------------------------------|-----|-----|----------------------------------------------|-----|-----|------------------------------------------|
|                       |                                               |     |     |                                              |     |     |                                          |
| Hexacosane-1,19-diol  | 437                                           | 452 | 527 | 201                                          | 443 | 353 | 4                                        |
| Hexacosane-1,18-diol  |                                               |     |     | 215                                          | 429 | 339 | 2                                        |
| Hexacosane-1,17-diol  |                                               |     |     | 229                                          | 415 | 325 | 5                                        |
| Hexacosane-1,16-diol  |                                               |     |     | 243                                          | 401 | 311 | 33                                       |
| Hexacosane-1,15-diol  |                                               |     |     | 257                                          | 387 | 297 | 52                                       |
| Hexacosane-1,14-diol  |                                               |     |     | 271                                          | 373 | 283 | 4                                        |
| Hexacosane-1,13-diol  |                                               |     |     | 285                                          | 359 | 269 | tr                                       |
| Octacosane-1,21-diol  | 465                                           | 480 | 555 | 201                                          | 471 | 381 | 1                                        |
| Octacosane-1,20-diol  |                                               |     |     | 215                                          | 457 | 367 | 3                                        |
| Octacosane -1,19-diol |                                               |     |     | 229                                          | 443 | 353 | 9                                        |
| Octacosane -1,18-diol |                                               |     |     | 243                                          | 429 | 339 | 23                                       |
| Octacosane -1,17-diol |                                               |     |     | 257                                          | 415 | 325 | 30                                       |
| Octacosane -1,16-diol |                                               |     |     | 271                                          | 401 | 311 | 25                                       |
| Octacosane -1,15-diol |                                               |     |     | 285                                          | 387 | 297 | 9                                        |
| Octacosane -1,14-diol |                                               |     |     | 299                                          | 373 | 283 | tr                                       |
| Triacontane-1,23-diol | 493                                           | 508 | 583 | 201                                          | 499 | 409 | 3                                        |
| Triacontane-1,22-diol |                                               |     |     | 215                                          | 485 | 395 | 3                                        |
| Triacontane-1,21-diol |                                               |     |     | 229                                          | 471 | 381 | 8                                        |
| Triacontane-1,20-diol |                                               |     |     | 243                                          | 457 | 367 | 30                                       |
| Triacontane-1,19-diol |                                               |     |     | 257                                          | 443 | 353 | 40                                       |
| Triacontane-1,18-diol |                                               |     |     | 271                                          | 429 | 339 | 8                                        |
| Triacontane-1,17-diol |                                               |     |     | 285                                          | 415 | 325 | 2                                        |
| Triacontane-1,16-diol |                                               |     |     | 299                                          | 401 | 311 | 1                                        |
