# Supplementary material for: Identification of In-Chain-Functionalized Compounds and Methyl-Branched Alkanes in Cuticular Waxes of Triticum aestivum cv. Bethlehem
Source: PubMed Central journal article supplement (PMC5098774; doi:10.1371/journal.pone.0165827), 2016-11-07
Supplement: pone.0165827.s003.pdf [file pone.0165827.s003.pdf]

**S3 Table. Characteristic fragments of esterified diols with one primary and one secondary hydroxyl function detected in wheat leaf wax.** The fragments (*m/z*) of trimethylsilyl ether derivatives used to identify different diol ester homologs and isomers are listed (fraction C).

| <b>Compound</b>                  | <b>Fragments characteristic of homolog (<i>m/z</i>)</b> | <b>Fragments characteristic of isomer (<i>m/z</i>)</b> |     |
|----------------------------------|---------------------------------------------------------|--------------------------------------------------------|-----|
| Octacosane-1,20-diol palmitate   | 239 257 313 329                                         | 215                                                    | 623 |
| Octacosane-1,19-diol palmitate   |                                                         | 229                                                    | 609 |
| Octacosane-1,18-diol palmitate   |                                                         | 243                                                    | 595 |
| Octacosane-1,17-diol palmitate   |                                                         | 257                                                    | 581 |
| Octacosane-1,16-diol palmitate   |                                                         | 271                                                    | 567 |
| Octacosane-1,15-diol palmitate   |                                                         | 285                                                    | 553 |
| Octacosane-1,14-diol palmitate   |                                                         | 299                                                    | 539 |
| Octacosane-1,20-diol stearate    | 267 285 341 357                                         | 215                                                    | 651 |
| Octacosane-1,19-diol stearate    |                                                         | 229                                                    | 637 |
| Octacosane-1,18-diol stearate    |                                                         | 243                                                    | 623 |
| Octacosane-1,17-diol stearate    |                                                         | 257                                                    | 609 |
| Octacosane-1,16-diol stearate    |                                                         | 271                                                    | 595 |
| Octacosane-1,15-diol stearate    |                                                         | 285                                                    | 581 |
| Octacosane-1,14-diol stearate    |                                                         | 299                                                    | 567 |
| Octacosane-1,20-diol arachidate  | 295 313 369 385                                         | 215                                                    | 679 |
| Octacosane-1,19-diol arachidate  |                                                         | 229                                                    | 665 |
| Octacosane-1,18-diol arachidate  |                                                         | 243                                                    | 651 |
| Octacosane-1,17-diol arachidate  |                                                         | 257                                                    | 637 |
| Octacosane-1,16-diol arachidate  |                                                         | 271                                                    | 623 |
| Octacosane-1,15-diol arachidate  |                                                         | 285                                                    | 609 |
| Octacosane-1,14-diol arachidate  |                                                         | 299                                                    | 595 |
| Octacosane-1,20-diol behenate    | 323 341 397 413                                         | 215                                                    | 707 |
| Octacosane-1,19-diol behenate    |                                                         | 229                                                    | 693 |
| Octacosane-1,18-diol behenate    |                                                         | 243                                                    | 679 |
| Octacosane-1,17-diol behenate    |                                                         | 257                                                    | 665 |
| Octacosane-1,16-diol behenate    |                                                         | 271                                                    | 651 |
| Octacosane-1,15-diol behenate    |                                                         | 285                                                    | 637 |
| Octacosane-1,14-diol behenate    |                                                         | 299                                                    | 623 |
| Octacosane-1,20-diol lignocerate | 351 369 425 441                                         | 215                                                    | 735 |
| Octacosane-1,19-diol lignocerate |                                                         | 229                                                    | 721 |
| Octacosane-1,18-diol lignocerate |                                                         | 243                                                    | 707 |
| Octacosane-1,17-diol lignocerate |                                                         | 257                                                    | 693 |
| Octacosane-1,16-diol lignocerate |                                                         | 271                                                    | 679 |
| Octacosane-1,15-diol lignocerate |                                                         | 285                                                    | 665 |
| Octacosane-1,14-diol lignocerate |                                                         | 299                                                    | 651 |
