# Supplementary material for: Identification of In-Chain-Functionalized Compounds and Methyl-Branched Alkanes in Cuticular Waxes of Triticum aestivum cv. Bethlehem
Source: PubMed Central journal article supplement (PMC5098774; doi:10.1371/journal.pone.0165827), 2016-11-07
Supplement: pone.0165827.s004.pdf [file pone.0165827.s004.pdf]

**S4 Table. Characteristic fragments of hydroxy-2-alkanol esters detected in wheat leaf wax.**

The fragments (*m/z*) of trimethylsilyl ether derivatives used to identify different ester homologs and isomers are listed (fraction **D**).

| Compound                         | Alternative name                     | Fragments characteristic of homolog ( <i>m/z</i> ) | Fragments characteristic of isomer type: |                        |
|----------------------------------|--------------------------------------|----------------------------------------------------|------------------------------------------|------------------------|
|                                  |                                      |                                                    | regiomer ( <i>m/z</i> )                  | metamer ( <i>m/z</i> ) |
| Tridecane-2,8-diol stearate      | 8-Hydroxytridecan-2-ol stearate      | 539                                                | 173 483 199 109                          | 267 285 341 357        |
| Tridecane-2,7-diol stearate      | 7-Hydroxytridecan-2-ol stearate      |                                                    | 187 469 185 95                           |                        |
| Pentadecane-2,8-diol palmitate   | 8-Hydroxypentadecan-2-ol palmitate   |                                                    | 201 455 199 109                          | 239 257 313 329        |
| Pentadecane-2,7-diol palmitate   | 7-Hydroxypentadecan-2-ol palmitate   |                                                    | 215 441 185 95                           |                        |
| Tridecane-2,8-diol arachidate    | 8-Hydroxytridecan-2-ol arachidate    | 567                                                | 173 511 199 109                          | 295 312 369 385        |
| Tridecane-2,7-diol arachidate    | 7-Hydroxytridecan-2-ol arachidate    |                                                    | 187 497 185 95                           |                        |
| Pentadecane-2,8-diol stearate    | 8-Hydroxypentadecan-2-ol stearate    |                                                    | 201 483 199 109                          | 267 285 341 357        |
| Pentadecane-2,7-diol stearate    | 7-Hydroxypentadecan-2-ol stearate    |                                                    | 215 469 185 95                           |                        |
| Tridecane-2,8-diol behenate      | 8-Hydroxytridecan-2-ol behenate      | 595                                                | 173 539 199 109                          | 323 340 397 413        |
| Tridecane-2,7-diol behenate      | 7-Hydroxytridecan-2-ol behenate      |                                                    | 187 525 185 95                           |                        |
| Pentadecane-2,8-diol arachidate  | 8-Hydroxypentadecan-2-ol arachidate  |                                                    | 201 511 199 109                          | 295 312 369 385        |
| Pentadecane-2,7-diol arachidate  | 7-Hydroxypentadecan-2-ol arachidate  |                                                    | 215 497 185 95                           |                        |
| Tridecane-2,8-diol lignocerate   | 8-Hydroxytridecan-2-ol lignocerate   | 623                                                | 173 567 199 109                          | 351 368 425 441        |
| Tridecane-2,7-diol lignocerate   | 7-Hydroxytridecan-2-ol lignocerate   |                                                    | 187 553 185 95                           |                        |
| Pentadecane-2,8-diol behenate    | 8-Hydroxypentadecan-2-ol behenate    |                                                    | 201 539 199 109                          | 323 340 397 413        |
| Pentadecane-2,7-diol behenate    | 7-Hydroxypentadecan-2-ol behenate    |                                                    | 215 525 185 95                           |                        |
| Tridecane-2,8-diol cerotate      | 8-Hydroxytridecan-2-ol cerotate      | 651                                                | 173 595 199 109                          | 379 396 453 469        |
| Tridecane-2,7-diol cerotate      | 7-Hydroxytridecan-2-ol cerotate      |                                                    | 187 581 185 95                           |                        |
| Pentadecane-2,8-diol lignocerate | 8-Hydroxypentadecan-2-ol lignocerate |                                                    | 201 567 199 109                          | 351 368 425 441        |
| Pentadecane-2,7-diol lignocerate | 7-Hydroxypentadecan-2-ol lignocerate |                                                    | 215 553 185 95                           |                        |
