# Supplementary material for: Identification of In-Chain-Functionalized Compounds and Methyl-Branched Alkanes in Cuticular Waxes of Triticum aestivum cv. Bethlehem
Source: PubMed Central journal article supplement (PMC5098774; doi:10.1371/journal.pone.0165827), 2016-11-07
Supplement: pone.0165827.s005.pdf [file pone.0165827.s005.pdf]

**S5 Table. Characteristic fragments of oxo-2-alkanol esters detected in wheat leaf wax.** The fragments (*m/z*) used to identify different ester homologs and isomers are listed (fraction E).

| Compound                              | Alternative name                 | Fragments characteristic of homolog ( <i>m/z</i> ) | Fragments characteristic of isomer type: |                        |
|---------------------------------------|----------------------------------|----------------------------------------------------|------------------------------------------|------------------------|
|                                       |                                  |                                                    | regiomer ( <i>m/z</i> )                  | metamer ( <i>m/z</i> ) |
| 2-Hydroxytridecan-8-one stearate      | 8-oxotridecan-2-ol stearate      | -                                                  | 99 114 424                               | 197 267 285            |
| 2-Hydroxytridecan-7-one stearate      | 7-oxotridecan-2-ol stearate      |                                                    | 113 128 410                              |                        |
| 2-Hydroxypentadecan-8-one palmitate   | 8-oxopentadecan-2-ol palmitate   |                                                    | 127 142 396                              | 225 239 257            |
| 2-Hydroxypentadecan-7-one palmitate   | 7-oxopentadecan-2-ol palmitate   |                                                    | 141 156 382                              |                        |
| 2-Hydroxytridecan-8-one arachidate    | 8-oxotridecan-2-ol arachidate    | -                                                  | 99 114 452                               | 197 295 313            |
| 2-Hydroxytridecan-7-one arachidate    | 7-oxotridecan-2-ol arachidate    |                                                    | 113 128 438                              |                        |
| 2-Hydroxypentadecan-8-one stearate    | 8-oxopentadecan-2-ol stearate    |                                                    | 127 142 424                              | 225 267 285            |
| 2-Hydroxypentadecan-7-one stearate    | 7-oxopentadecan-2-ol stearate    |                                                    | 141 156 410                              |                        |
| 2-Hydroxytridecan-8-one behenate      | 8-oxotridecan-2-ol behenate      | -                                                  | 99 114 480                               | 197 323 341            |
| 2-Hydroxytridecan-7-one behenate      | 7-oxotridecan-2-ol behenate      |                                                    | 113 128 466                              |                        |
| 2-Hydroxypentadecan-8-one arachidate  | 8-oxopentadecan-2-ol arachidate  |                                                    | 127 142 452                              | 225 295 313            |
| 2-Hydroxypentadecan-7-one arachidate  | 7-oxopentadecan-2-ol arachidate  |                                                    | 141 156 438                              |                        |
| 2-Hydroxytridecan-8-one lignocerate   | 8-oxotridecan-2-ol lignocerate   | -                                                  | 99 114 508                               | 197 351 369            |
| 2-Hydroxytridecan-7-one lignocerate   | 7-oxotridecan-2-ol lignocerate   |                                                    | 113 128 494                              |                        |
| 2-Hydroxypentadecan-8-one behenate    | 8-oxopentadecan-2-ol behenate    |                                                    | 127 142 480                              | 225 323 341            |
| 2-Hydroxypentadecan-7-one behenate    | 7-oxopentadecan-2-ol behenate    |                                                    | 141 156 466                              |                        |
| 2-Hydroxytridecan-8-one cerotate      | 8-oxotridecan-2-ol cerotate      | -                                                  | 99 114 536                               | 197 379 397            |
| 2-Hydroxytridecan-7-one cerotate      | 7-oxotridecan-2-ol cerotate      |                                                    | 113 128 522                              |                        |
| 2-Hydroxypentadecan-8-one lignocerate | 8-oxopentadecan-2-ol lignocerate |                                                    | 127 142 508                              | 225 351 369            |
| 2-Hydroxypentadecan-7-one lignocerate | 7-oxopentadecan-2-ol lignocerate |                                                    | 141 156 494                              |                        |
