# Supplementary material for: Identification of In-Chain-Functionalized Compounds and Methyl-Branched Alkanes in Cuticular Waxes of Triticum aestivum cv. Bethlehem
Source: PubMed Central journal article supplement (PMC5098774; doi:10.1371/journal.pone.0165827), 2016-11-07
Supplement: pone.0165827.s006.pdf [file pone.0165827.s006.pdf]

**S6 Table. Characteristic fragments of 4-alkylbutan-4-olides detected in wheat leaf wax.** The fragments (*m/z*) used to identify different homologs and isomers are listed (fraction F).

| <b>Compound</b>           | <b>Alternative name</b>                         | <b>Fragments characteristic of homolog (<i>m/z</i>)</b> |     |     |     |
|---------------------------|-------------------------------------------------|---------------------------------------------------------|-----|-----|-----|
| 4-Docosylbutan-4-olide    | 4-Hydroxyhexacosanoic acid $\gamma$ -lactone    | 332                                                     | 358 | 376 | 394 |
| 4-Tetracosylbutan-4-olide | 4-Hydroxyoctacosanoic acid $\gamma$ -lactone    | 360                                                     | 386 | 404 | 422 |
| 4-Hexacosylbutan-4-olide  | 4-Hydroxytriacontanoic acid $\gamma$ -lactone   | 388                                                     | 414 | 432 | 450 |
| 4-Octacosylbutan-4-olide  | 4-Hydroxydotriacontanoic acid $\gamma$ -lactone | 416                                                     | 442 | 460 | 478 |
