# Supplementary material for: Identification of In-Chain-Functionalized Compounds and Methyl-Branched Alkanes in Cuticular Waxes of Triticum aestivum cv. Bethlehem
Source: PubMed Central journal article supplement (PMC5098774; doi:10.1371/journal.pone.0165827), 2016-11-07
Supplement: pone.0165827.s007.pdf [file pone.0165827.s007.pdf]

**S7 Table. Characteristic fragments and relative abundances of branched alkanes detected in wheat leaf wax.** The fragments ( $m/z$ ) of used to identify different secondary alkane homologs and isomers are listed. Relative abundances (percent of respective homologs) were calculated from the abundances of the even-numbered, heavier isomer-specific fragments in a single, representative GC-MS run of the TLC fraction  $R_f$  1.00 (fraction **G**).

| Compound                | Chain length | Carbon number | Fragments characteristic of homolog ( $m/z$ ) |     | Fragments characteristic of isomer ( $m/z$ ) |         | Relative isomer abundance (% of homolog) |
|-------------------------|--------------|---------------|-----------------------------------------------|-----|----------------------------------------------|---------|------------------------------------------|
| 9-Methylheptacosane     | 27           | 28            | 379                                           | 394 | 140/141                                      | 280/281 | 21                                       |
| 10-Methylheptacosane    | 27           | 28            |                                               |     | 154/155                                      | 266/267 | 7                                        |
| 11-Methylheptacosane    | 27           | 28            |                                               |     | 168/169                                      | 252/253 | 47                                       |
| 12-Methylheptacosane    | 27           | 28            |                                               |     | 182/183                                      | 238/239 | 1                                        |
| 13-Methylheptacosane    | 27           | 28            |                                               |     | 196/197                                      | 224/225 | 25                                       |
| 14-Methylheptacosane    | 27           | 28            |                                               |     | 210/211                                      |         | tr                                       |
| 9-Methyloctacosane      | 28           | 29            | 393                                           | 408 | 140/141                                      | 294/295 | 16                                       |
| 10-Methyloctacosane     | 28           | 29            |                                               |     | 154/155                                      | 280/281 | 28                                       |
| 11-Methyloctacosane     | 28           | 29            |                                               |     | 168/169                                      | 266/267 | 10                                       |
| 12-Methyloctacosane     | 28           | 29            |                                               |     | 182/183                                      | 252/253 | 46                                       |
| 13-Methyloctacosane     | 28           | 29            |                                               |     | 196/197                                      | 238/239 | tr                                       |
| 14-Methyloctacosane     | 28           | 29            |                                               |     | 210/211                                      | 224/225 | 1                                        |
| 9-Methylnonacosane      | 29           | 30            | 407                                           | 422 | 140/141                                      | 308/309 | 15                                       |
| 10-Methylnonacosane     | 29           | 30            |                                               |     | 154/155                                      | 294/295 | 5                                        |
| 11-Methylnonacosane     | 29           | 30            |                                               |     | 168/169                                      | 280/281 | 45                                       |
| 12-Methylnonacosane     | 29           | 30            |                                               |     | 182/183                                      | 266/267 | 1                                        |
| 13-Methylnonacosane     | 29           | 30            |                                               |     | 196/197                                      | 252/253 | 25                                       |
| 14-Methylnonacosane     | 29           | 30            |                                               |     | 210/211                                      | 238/239 | 2                                        |
| 15-Methylnonacosane     | 29           | 30            |                                               |     | 224/225                                      |         | 7                                        |
| 9-Methyltriacontane     | 30           | 31            | 421                                           | 436 | 140/141                                      | 322/323 | 10                                       |
| 10-Methyltriacontane    | 30           | 31            |                                               |     | 154/155                                      | 308/309 | 29                                       |
| 11-Methyltriacontane    | 30           | 31            |                                               |     | 166/167                                      | 294/295 | 9                                        |
| 12-Methyltriacontane    | 30           | 31            |                                               |     | 182/183                                      | 280/281 | 39                                       |
| 13-Methyltriacontane    | 30           | 31            |                                               |     | 196/197                                      | 266/267 | 6                                        |
| 14-Methyltriacontane    | 30           | 31            |                                               |     | 210/211                                      | 252/253 | 6                                        |
| 15-Methyltriacontane    | 30           | 31            |                                               |     | 224/225                                      | 238/239 | 1                                        |
| 9-Methylhentriacontane  | 31           | 32            | 435                                           | 450 | 140/141                                      | 336/337 | 16                                       |
| 10-Methylhentriacontane | 31           | 32            |                                               |     | 154/155                                      | 322/323 | 5                                        |
| 11-Methylhentriacontane | 31           | 32            |                                               |     | 168/169                                      | 308/309 | 49                                       |
| 12-Methylhentriacontane | 31           | 32            |                                               |     | 182/183                                      | 294/295 | 4                                        |
| 13-Methylhentriacontane | 31           | 32            |                                               |     | 196/197                                      | 280/281 | 18                                       |
| 14-Methylhentriacontane | 31           | 32            |                                               |     | 210/211                                      | 266/267 | 3                                        |
| 15-Methylhentriacontane | 31           | 32            |                                               |     | 224/225                                      | 252/253 | 5                                        |
| 16-Methylhentriacontane | 31           | 32            |                                               |     | 238/239                                      |         | 1                                        |
| 9-Methyldotriacontane   | 32           | 33            | 449                                           | 464 | 140/141                                      | 350/351 | 13                                       |
| 10-Methyldotriacontane  | 32           | 33            |                                               |     | 154/155                                      | 336/337 | 27                                       |
| 11-Methyldotriacontane  | 32           | 33            |                                               |     | 168/169                                      | 322/323 | 8                                        |
| 12-Methyldotriacontane  | 32           | 33            |                                               |     | 182/183                                      | 308/309 | 43                                       |
| 13-Methyldotriacontane  | 32           | 33            |                                               |     | 196/197                                      | 294/295 | 4                                        |
| 14-Methyldotriacontane  | 32           | 33            |                                               |     | 210/211                                      | 280/281 | 4                                        |
| 15-Methyldotriacontane  | 32           | 33            |                                               |     | 224/225                                      | 266/267 | 1                                        |
| 16-Methyldotriacontane  | 32           | 33            |                                               |     | 238/239                                      | 252/253 | 1                                        |
